# Supplementary material for: Characterization of Contributing Factors to Variability in Morphine Clearance Through PBPK Modeling Implemented With OCT1 Transporter
Source: PubMed Central journal article supplement — CPT Pharmacometrics Syst Pharmacol. 2016 Dec 9;6(2):110–9. doi: 10.1002/psp4.12144 (PMC5321811; doi:10.1002/psp4.12144), 2016-12-09
Supplement: PSP4-6-110-s005.pdf [file PSP4-6-110-s005.pdf]

|                  |  |
|------------------|--|
| <b>Substrate</b> |  |
|------------------|--|

|                                       |                        |
|---------------------------------------|------------------------|
| <b>Compound Name</b>                  | <b>Morphine</b>        |
| <b>Version number</b>                 | <b>Not applicable</b>  |
| <b>Compound Type</b>                  | <b>Small Molecule</b>  |
| <b>PhysChem and Blood Binding</b>     |                        |
| <b>Mol Weight (g/mol)</b>             | <b>285.340</b>         |
| <b>log P</b>                          | <b>0.770</b>           |
| <b>Compound Type</b>                  | <b>Ampholyte</b>       |
| <b>pKa 1</b>                          | <b>9.630</b>           |
| <b>pKa 2</b>                          | <b>7.930</b>           |
| <b>BP Input</b>                       | <b>User Input</b>      |
| <b>B/P</b>                            | <b>1.080</b>           |
| <b>Haematocrit</b>                    | <b>45.000</b>          |
| <b>fu Input</b>                       | <b>User</b>            |
| <b>fu</b>                             | <b>0.620</b>           |
| <b>Reference Binding Component</b>    | <b>HSA</b>             |
| <b>Protein Reference Conc (g/L)</b>   | <b>45.000</b>          |
| <b>Distribution</b>                   |                        |
| <b>Distribution Model</b>             | <b>Full PBPK Model</b> |
| <b>Replacement Organ?</b>             | <b>No</b>              |
| <b>Organ Replaced</b>                 | <b>n/a</b>             |
| <b>User-defined Additional Organ</b>  | <b>No</b>              |
| <b>Type</b>                           | <b>n/a</b>             |
| <b>Vss mode</b>                       | <b>Predicted</b>       |
| <b>Prediction Method</b>              | <b>Method 2</b>        |
| <b>Concentration-dependent volume</b> | <b>No</b>              |
| <b>log Po:w</b>                       | <b>0.770</b>           |
| <b>logP vo:w</b>                      | <b>Predicted</b>       |
| <b>logP vo:w value</b>                | <b>-0.491</b>          |
| <b>Compound Type</b>                  | <b>Ampholyte</b>       |
| <b>pKa 1</b>                          | <b>9.630</b>           |
| <b>pKa 2</b>                          | <b>7.930</b>           |
| <b>B/P</b>                            | <b>1.080</b>           |
| <b>Haematocrit</b>                    | <b>45.000</b>          |
| <b>fu</b>                             | <b>0.620</b>           |
| <b>Adipose Input Type</b>             | <b>Predicted</b>       |
| <b>Adipose Value</b>                  | <b>1.079</b>           |
| <b>Bone Input Type</b>                | <b>Predicted</b>       |
| <b>Bone Value</b>                     | <b>2.092</b>           |
| <b>Brain Input Type</b>               | <b>Predicted</b>       |
| <b>Brain Value</b>                    | <b>1.517</b>           |
| <b>Gut Input Type</b>                 | <b>Predicted</b>       |
| <b>Gut Value</b>                      | <b>7.228</b>           |
| <b>Heart Input Type</b>               | <b>Predicted</b>       |

|                                                 |                 |
|-------------------------------------------------|-----------------|
| Heart Value                                     | 7.737           |
| Kidney Input Type                               | Predicted       |
| Kidney Value                                    | 4.187           |
| Liver Input Type                                | Predicted       |
| Liver Value                                     | 12.417          |
| Lung Input Type                                 | Predicted       |
| Lung Value                                      | 1.970           |
| Muscle Input Type                               | Predicted       |
| Muscle Value                                    | 6.597           |
| Skin Input Type                                 | Predicted       |
| Skin Value                                      | 3.521           |
| Spleen Input Type                               | Predicted       |
| Spleen Value                                    | 7.273           |
| Pancreas Input Type                             | Predicted       |
| Pancreas Value                                  | 4.771           |
| Kp Scalar Value                                 | 1.000           |
|                                                 |                 |
| Elimination                                     |                 |
| Clearance Type                                  | Enzyme Kinetics |
| Pathway 1                                       | 6MG             |
| Enzyme                                          | UGT2B7          |
| Vmax                                            | 1917.000        |
| Km                                              | 115.800         |
| fu mic                                          | 1.000           |
|                                                 |                 |
| Pathway 1                                       | 3MG             |
| Enzyme                                          | UGT2B7          |
| Vmax                                            | 9250.000        |
| Km                                              | 115.800         |
| fu mic                                          | 1.000           |
|                                                 |                 |
| CL R (L/h)                                      | 8.000           |
|                                                 |                 |
| Transport                                       |                 |
| Organ/Tissue                                    | Liver           |
| CL <sub>PD</sub> (mL/min/10 <sup>6</sup> cells) | 0.003           |
| fuIW Type                                       | Predicted       |
| fuEW Type                                       | Predicted       |
|                                                 |                 |
| Organ/Tissue                                    | Liver           |
| Transporter                                     | SLC22A1 (OCT1)  |
| Location                                        | Sinusoidal      |
| Function                                        | Influx          |
| Jmax (pmol/min/10 <sup>6</sup> cells)           | 29.000          |
| Km (μM)                                         | 3.400           |
| System                                          | User            |
| RAF/REF                                         | 5.100           |
